# Supplementary material
Source: PubMed Central journal article supplement (PMC283595)

Expression vector construction:

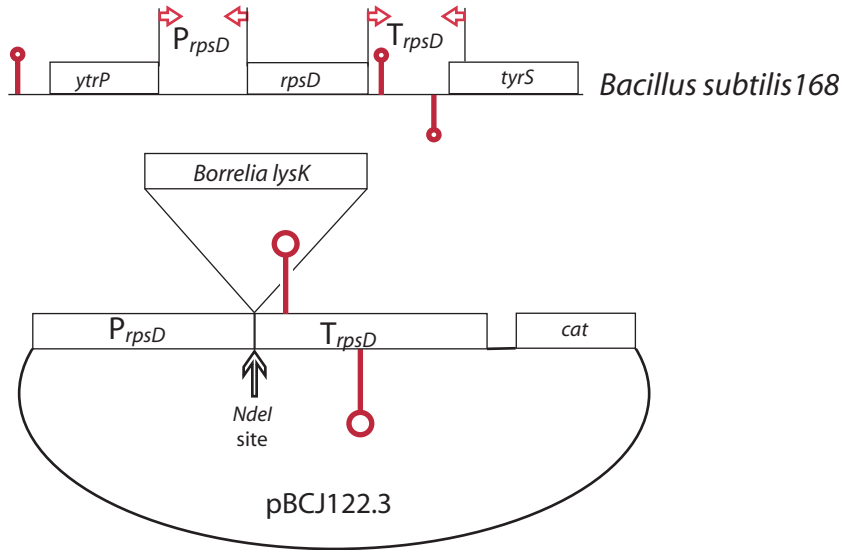

First Integration:

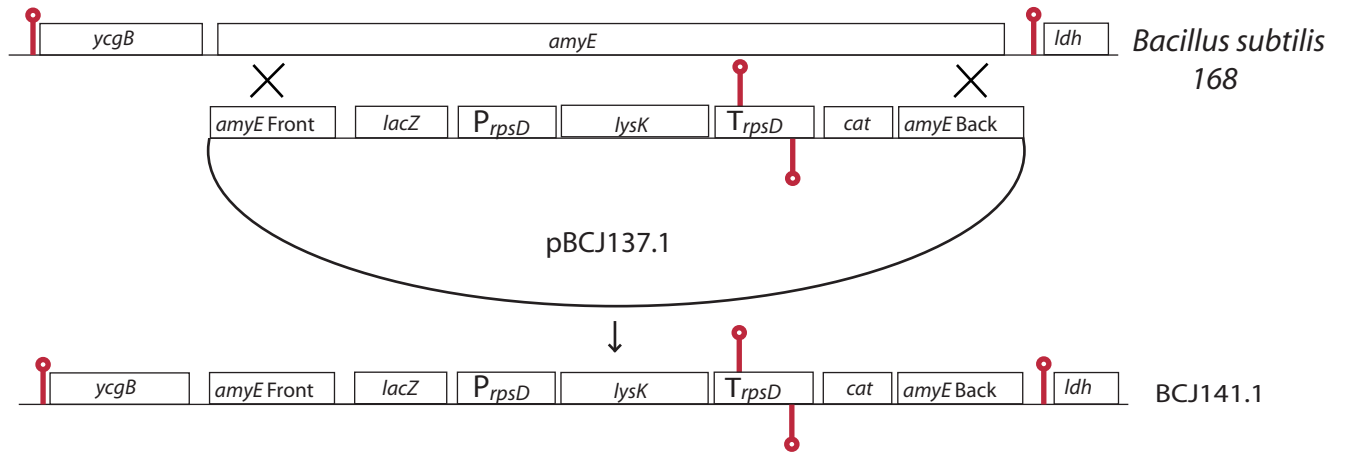

Second Integration:

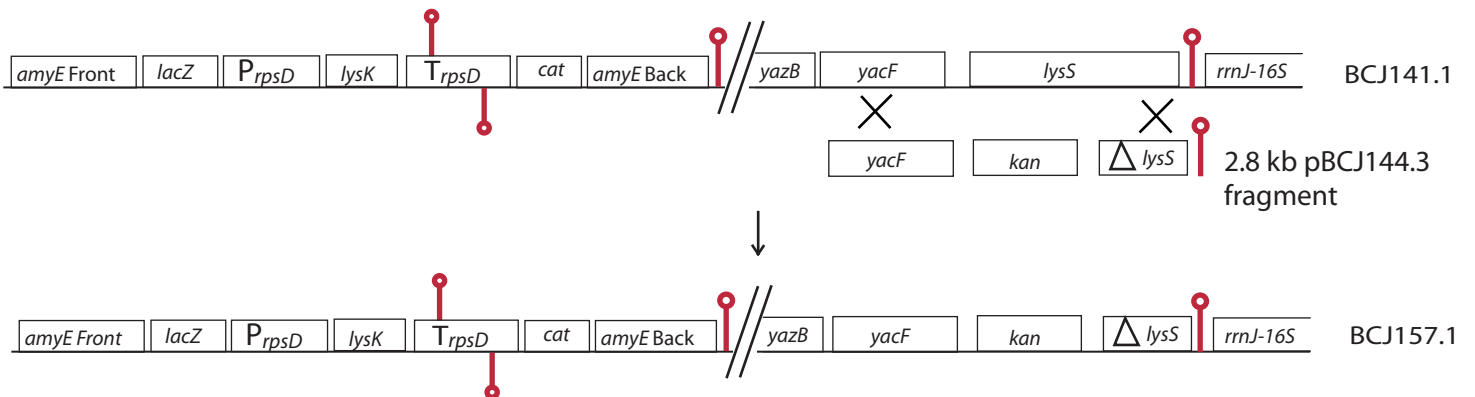

Supplement: pnas_100_24_14351__10.pdf [file pnas_100_24_14351__10.pdf]

A

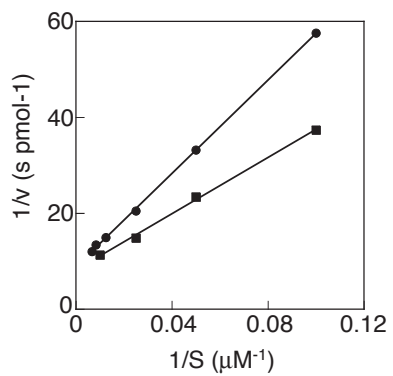

B

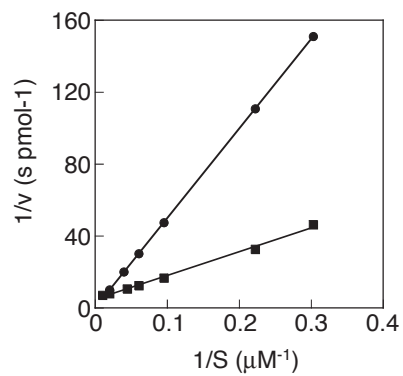

Supplement: pnas_100_24_14351__12.pdf [file pnas_100_24_14351__12.pdf]

### First Integration:

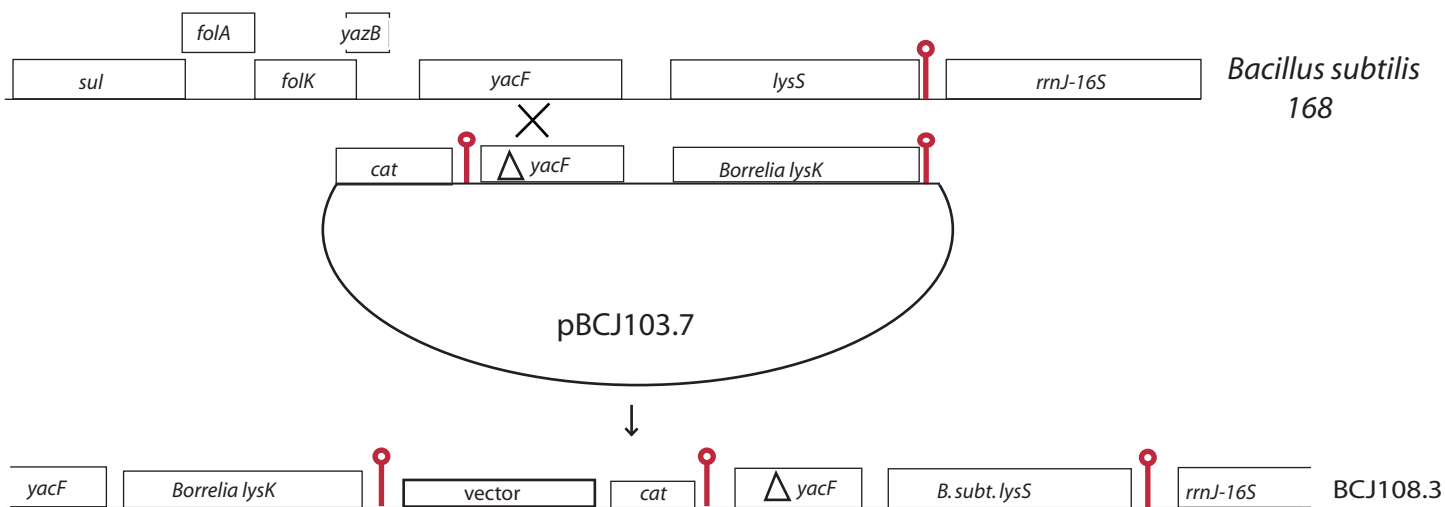

### Second Integration:

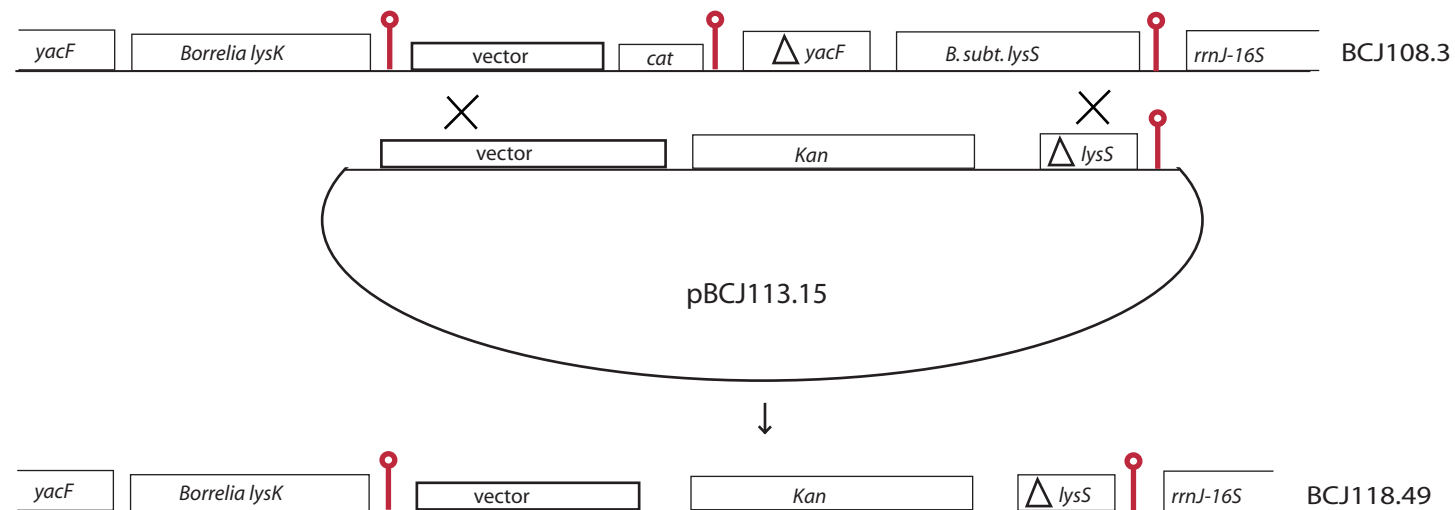

Supplement: pnas_100_24_14351__4.pdf [file pnas_100_24_14351__4.pdf]

First Integration:

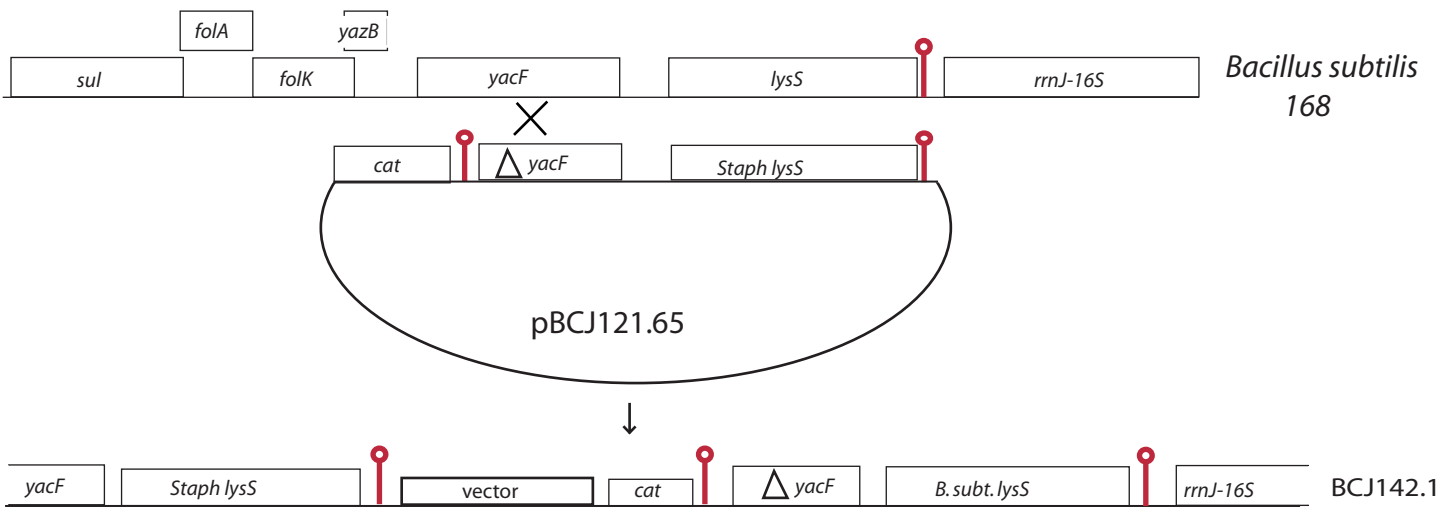

Second Integration:

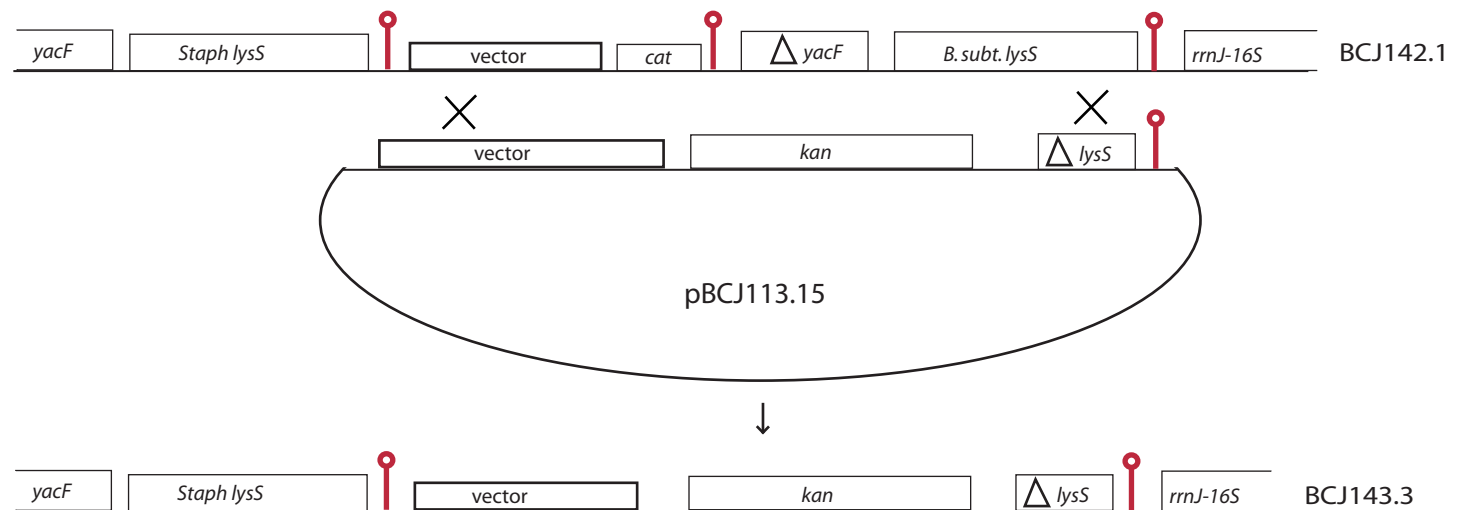

Supplement: pnas_100_24_14351__6.pdf [file pnas_100_24_14351__6.pdf]

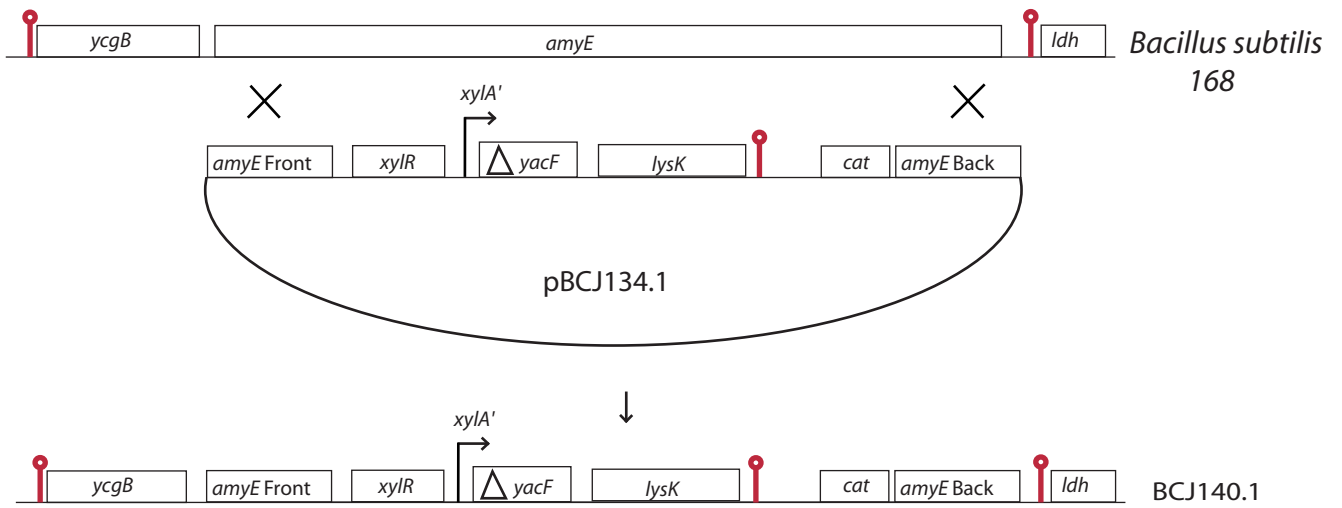

Supplement: pnas_100_24_14351__8.pdf [file pnas_100_24_14351__8.pdf]
